1           **Genomic insights into present local adaptation and future climate change**  
2           **vulnerability of a keystone forest tree species in East Asian**

3

4   Yupeng Sang<sup>1#</sup>, Zhiqin Long<sup>1#</sup>, Xuming Dan<sup>1</sup>, Jiajun Feng<sup>1</sup>, Tingting Shi<sup>1</sup>, Changfu Jia<sup>1</sup>,  
5   Xinxin Zhang<sup>1</sup>, Qiang Lai<sup>1</sup>, Guanglei Yang<sup>1</sup>, Hongying Zhang<sup>1</sup>, Xiaoting Xu<sup>1</sup>,  
6   Huanhuan Liu<sup>1</sup>, Yuanzhong Jiang<sup>1</sup>, Pär K. Ingvarsson<sup>2</sup>, Jianquan Liu<sup>1\*</sup>, Kangshan  
7   Mao<sup>1\*</sup>, Jing Wang<sup>1\*</sup>

8

9   1 *Key Laboratory for Bio-Resources and Eco-Environment, College of Life Science,*  
10 *Sichuan University, Chengdu, China*

11 2 *Linnean Centre for Plant Biology, Department of Plant Biology, Uppsala BioCenter,*  
12 *Swedish University of Agricultural Sciences, Uppsala, Sweden*

13

14

15 #These authors contributed equally to the work

16 \*Corresponding authors: [liujq@nwipb.cas.cn](mailto:liujq@nwipb.cas.cn); [maokangshan@163.com](mailto:maokangshan@163.com);

17 [wangjing2019@scu.edu.cn](mailto:wangjing2019@scu.edu.cn)

18

19 **ABSTRACT**

20

21 Rapid global climate change is posing a huge threat to biodiversity. Assessments of the  
22 adaptive capacity for most taxa is usually performed on the species as a whole, but fails  
23 to incorporate intraspecific adaptive variation that may play a fundamental role in  
24 buffering future shifting climates. Here we generate a chromosome-scale genome  
25 assembly for *Populus koreana*, a pioneer and keystone tree species in East Asia  
26 temperate forests. We also obtain whole-genome sequences of 230 individuals collected  
27 from 24 natural populations. An integration of population genomics and environmental  
28 variables was performed to reveal the genomic basis of local adaptation to diverse  
29 climate variable. We identify a set of climate-associated single nucleotide  
30 polymorphisms (SNPs), insertions-deletions (Indels) and structural variations (SVs), in  
31 particular numerous adaptive non-coding variants distributed across the genome of *P.*  
32 *koreana*. We incorporate these variants into an environmental modelling scheme to  
33 predict spatiotemporal responses of *P. koreana* to future climate change. Our results  
34 highlight the insights that the integration of genomic and climate data can shed on the  
35 future evolutionary adaptive capacities of a species to changing environmental  
36 conditions.

37

## 38 **Introduction**

39

40 Climate change is predicted to become a major threat to biodiversity and there is ample  
41 evidence of climate-induced local extinctions among plant and animal species <sup>1</sup>. To  
42 escape demographic collapses and extinction, species have to shift their range and  
43 migrate to suitable locations, or persist in the same location by genetically adapting to  
44 changing environmental conditions from standing genetic variation and *de novo*  
45 mutations <sup>2</sup>. However, migrating in order to keep pace with rapid climate change may  
46 be difficult for many organisms, like plants <sup>3</sup>. Therefore, understanding and predicting  
47 the evolutionary potential of a species for future adaptations is not only relevant for  
48 understanding whether and how natural species can persist in the context of climate  
49 change, but can also benefit conservation and management strategies to cope with  
50 global biodiversity loss <sup>4,5</sup>. The traditional way to assess the capacity for future  
51 evolutionary adaptation is via reciprocal transplant experiments or other approaches  
52 that involve tracking genetic lineages for many generations <sup>6</sup>. Doing so is challenging  
53 or often unfeasible for many wild non-model organisms due to experimental  
54 intractability, long generation times or other challenges to obtain fitness-related  
55 phenotypic traits <sup>7-9</sup>.

56 Using genomic data to predict the evolutionary potential of populations under  
57 climate change provides a different perspective for understanding adaptive  
58 evolutionary processes and for assessing the future vulnerability of different  
59 populations <sup>10,11,12</sup>. The first step to evaluate the evolutionary adaptation under changing  
60 environmental conditions is to investigate the current spatial patterns of genomic  
61 variation, followed by the identification of the genetic basis of local adaptation <sup>13</sup>.  
62 Although there may be millions of variants across the genome within any specific  
63 species, relatively few are expected to be related to climate adaptation and hence are  
64 relevant for accurate estimates of adaptive capacity. The process of discovering the  
65 genomic variants associated with climate adaptation lies at the core of genomic

66 prediction for future climate vulnerability<sup>14</sup>. Genotype-environmental association  
67 approaches are increasingly used to identify loci involved in climate adaptation<sup>15</sup>. Once  
68 candidates for locally adaptive allelic variation have been identified, it is possible to  
69 measure genomic vulnerability, which assesses the amount of change in the genetic  
70 composition of a population that is required to track future environmental conditions  
71<sup>10,16</sup>. As such, it goes beyond species-level distribution modelling and provides key  
72 insights into assessing the possible maladaptation of populations under future climate  
73 change<sup>4,14</sup>. Therefore, genomic predictions of climate adaptation and maladaptation  
74 have immense potential to inform conservation management, especially for threatened  
75 species most at risk of local extinction, and/or non-model long-lived species where  
76 other experiments are impractical<sup>17,18</sup>.

77 Forest trees play a leading role in the global carbon cycle and, along with the  
78 characteristics of being the most efficient carbon sink, they will play an increasingly  
79 important role in combating climate change and global warming<sup>9,19</sup>. However, trees  
80 are characterized by long lifespans, large body sizes and often have long generation  
81 times and large distribution ranges which make them particularly vulnerable to  
82 maladaptation under altered climatic scenarios<sup>20</sup>. With the advance of genomic  
83 technologies, it is now possible to characterize genome-wide patterns of genetic  
84 diversity even in non-model species<sup>21,22</sup>. In this context, integrating genomic data into  
85 predictive models aimed at quantifying and map spatial patterns of climate  
86 maladaptation is especially important for long-lived organisms like trees, for which  
87 climate change is likely to happen within the lifetimes of single individuals<sup>23</sup>.

88 In the present study, we aim to utilize landscape genomic approaches to investigate  
89 the contemporary and future patterns of climate-associated genetic variation for a long-  
90 lived poplar species, *Populus koreana*, which is a member of the family *Salicaceae* and  
91 is one of the dominant tree species in temperate deciduous forests in East Asia. We  
92 present the first *de novo* chromosome-scale reference genome of *P. koreana*, which is  
93 then used as a reference for a population genomics study of 230 individuals collected

94 from 24 natural populations across the species' distribution. We characterize patterns  
95 of genome-wide variation, including not only single-nucleotide polymorphisms (SNPs)  
96 but also small insertions/deletions (Indels) and larger structural variants (SVs). This  
97 variation is further analyzed to decipher genetic diversity, population structure and the  
98 demographic history of the species. Finally, we identify candidate loci potentially  
99 involved in climate adaptation through genome-wide environmental association studies.  
100 By using two different analytical approaches we carry out genomic vulnerability  
101 assessment and identify areas where *P. koreana* would be at greater risk due to future  
102 climate change.

103

## 104 **Results and Discussion**

105

### 106 **Chromosome-scale genome assembly of *P. koreana***

107

108 For *de novo* assembly of the *P. koreana* genome, we integrated data from three  
109 sequencing and assembly technologies: ~42.42 Gb of Nanopore long-read sequencing  
110 (106×), ~29.82 Gb of short-read Illumina sequencing (74×), and ~54.22 Gb of Hi-C  
111 paired-end reads (137×) (Supplementary Table 1-4). The final assembly captured 401.4  
112 Mb of genome sequence, with contig N50 of 6.41 Mb and approximately 99.6%  
113 (~399.94 Mb) of the contig sequences anchored to 19 pseudo-chromosomes (Fig. 1a, b;  
114 Table 1; Supplementary Table 5), which corresponds to the haploid chromosome  
115 number of the species. The high quality of the *P. koreana* assembly was supported by a  
116 high mapping rate (99.4%) of Illumina short reads. In addition, we identified 97.8% of  
117 the single-copy orthologs from the Benchmarking Universal Single-Copy Orthologs  
118 (BUSCO) analysis (Supplementary Table 6), further confirming the continuity and  
119 completeness of the assembled *P. koreana* genome.

120 Repetitive sequences were identified using a combination of homology-based and  
121 ab initio approaches. In total, 37.2% of the genome sequences were identified as

122 repetitive elements, including 16.0% of retrotransposons and 17.9% of DNA  
123 transposons. Long-terminal repeat (LTR) retrotransposons were found to account for  
124 15.7% of the genome (Supplementary Table 7). After masking the repetitive sequences,  
125 we carried out a combination of transcriptome, homology and *ab initio*-based  
126 approaches to predict genes. A total of 37,072 protein-coding genes were annotated,  
127 with an average coding sequence length of 1,136 bp and an average of five exons per  
128 gene (Supplementary Table 8). Of the 37,072 genes, 35,380 (95.4%) could be annotated  
129 by at least one public database e. g. Pfam, InterPro, NR, Swiss-Prot, GO and KEGG  
130 (Supplementary Table 9). We also identified a set of noncoding RNAs in the *P. koreana*  
131 genome (Supplementary Table 10).

132 To investigate the evolutionary history of *P. koreana*, we performed a gene family  
133 clustering using the *P. koreana* genome and 12 other representative angiosperm species,  
134 including eight Salicaceae species and four other outgroup species (Fig. 1c). We  
135 identified 905 single-copy gene families and used these for phylogenetic tree  
136 construction and species divergence time estimation. The phylogenetic analysis showed  
137 that *P. koreana* was most closely related to *P. trichocarpa* compared to other selected  
138 species in the genus of *Populus*, and the divergence time of the two species was  
139 estimated to approximately 2.69 million years ago (Mya). The gene family analysis also  
140 revealed 1,265 and 2,998 gene families have undergone significant expansion or  
141 contraction in *P. koreana* respectively. Gene Ontology (GO) enrichment analyses  
142 showed that the expanded gene families were significantly enriched in stress response,  
143 biosynthetic processes, secondary metabolism, and response to external biotic stimulus  
144 (adjusted  $P < 0.01$ ) (Supplementary Fig. 1; Supplementary Table 11). Furthermore,  
145 investigation of collinear paralogs in the *P. koreana* genome confirmed the occurrence  
146 of whole-genome duplication (WGD) (Fig. 1a). By comparing the density distribution  
147 of synonymous substitution rates per site ( $K_s$ ) of collinear paralogs and orthologs  
148 between *P. koreana* and other *Salicaceae* species, the results suggested that all  
149 *Salicaceae* species shared the same WGD event before their divergence (Fig. 1d). The

150 shared WGD event was also confirmed by the extensive collinearity between the  
151 genomes of *P. koreana* and *P. trichocarpa* (Supplementary Fig. 2)<sup>24</sup>.

152

### 153 **Population structure, genetic diversity and demographic history**

154

155 To explore genetic variation in *P. koreana*, we generated whole-genome resequencing  
156 data of 230 individuals from 24 populations sampled throughout the natural distribution  
157 of the species in Northeast China (Fig. 2a). On average, ~95% of the clean reads were  
158 aligned onto the *P. koreana* genome, with an average depth of 27.4× and coverage of  
159 94.6% (Supplementary Table 12). Using this dataset, we identified a total of 16,619,620  
160 high-quality SNPs and 2,663,202 Indels (shorter than or equal to 50bp). In addition, we  
161 also identified a final set of 90,357 large SVs (>50bp).

162 We first used ADMIXTURE to investigate the genetic structure of the *P. koreana*  
163 populations and found that the mode with the number of clusters (*K*) set to 3 exhibited  
164 the lowest cross-validation error (Fig. 2a, b; Supplementary Fig. 3), which broadly  
165 separated the individuals into two geographical groups (North and South). The North  
166 group consists of 66 individuals from seven populations in the  
167 Greater Khingan Mountains area while the other 164 individuals from seventeen  
168 populations of the Changbai Mountains area, formed the South group. The  
169 classification was also supported by a neighbor-joining (NJ) phylogenetic tree which  
170 confirmed the two genetic groups (Supplementary Fig. 4). We further examined  
171 patterns of genetic differentiation and isolation-by-distance (IBD) between and within  
172 each group (Fig. 2c). We detected significant IBD in the southern group and in all  
173 populations combined, but not in the northern group, possibly owing to the small  
174 number of populations used for the test in the northern group. Moreover, the pattern of  
175 IBD was stronger for all populations combined compared to populations in either the  
176 southern or northern group alone. It is possible that the allopatric fragmentation into  
177 isolated refuges during glacial periods has contributed to the accumulation of genetic

178 differences between the disjunct populations, in particular because no or few  
179 distribution records are present in the intermediate areas<sup>25, 26</sup>. Nevertheless, the genetic  
180 differentiation between the two genetic groups was found to be weak (Supplementary  
181 Fig. 5, the average  $F_{ST}$  values: 0.021). The genome-wide screens of genetic variation  
182 within and between groups revealed that nucleotide divergence ( $d_{xy}$ ) between the two  
183 groups was almost the same as the nucleotide diversity within groups (Supplementary  
184 Fig. 6), again suggesting that population structure in *P. koreana* is relatively weak.

185 To further infer the demographic history of the *P. koreana*, we performed the  
186 pairwise sequentially Markovian coalescent (PSMC) to assess change in effective  
187 population size ( $N_e$ ) over the past ~3-4 million years ago (Mya) (Fig. 2d). We found  
188 that different populations of *P. koreana* displayed highly similar demographic  
189 trajectories (Supplementary Fig. 7). The inferred  $N_e$  only differed between the southern  
190 and northern groups following the last glacial maximum (LGM, 10,000-20,000 years  
191 ago), where samples from the northern group showed a steady population decline while  
192 a slight population expansion was observed in samples from the southern group. The  
193 inferred demographic histories of *P. koreana* populations were also confirmed by the  
194 patterns in site frequency spectrum as summarized by Tajima's D statistics  
195 (Supplementary Fig. 8), where Tajima's D was on average positive in the northern  
196 group populations while the average Tajima's D was slight negative in the southern  
197 group.

198 We estimated nucleotide diversity ( $\pi$ ) in 10 Kbp non-overlapping windows across  
199 the genome for the 24 populations and found qualitatively similar results, with an  
200 average diversity of 1.08% (Supplementary Fig. 9). In addition, the genome-wide decay  
201 of linkage disequilibrium (LD) as a function of physical distance showed similar  
202 patterns in the southern and northern populations, with  $r^2$  declining below 0.2 after ~15  
203 Kbp on average (Supplementary Fig. 10). Overall, our results reveal weak population  
204 structure in *P. koreana* between southern and northern population groups which might  
205 have been geographically isolated following the LGM.



206

## 207 **Identifying genomic variants associated with local climate adaptation**

208

209 The high-quality reference genome for *P. koreana* coupled with the high-depth  
210 resequencing data generated in this study facilitate the precise characterization of  
211 genomic information, including not only SNPs, but also Indels and SVs that are usually  
212 ignored<sup>27</sup>. To investigate the extent to which genetic variation is driven by  
213 contemporary climate gradients and to detect the environment-associated genetic  
214 variants, we used two complementary genotype--environment association (GEA)  
215 approaches. First, we tested for GEAs for 19 environmental variables (10 temperature  
216 and 9 precipitation-related variables, Supplementary Table 13) using latent fixed mixed  
217 modeling (LFMM)<sup>28</sup>, which tests for associations between genotypes and environment  
218 variable while accounting for background population structure. With a q-value cut-off  
219 of 0.05, we identified a total of 3,013 SNPs, 378 Indels, and 44 SVs (Supplementary  
220 Fig. 11), involving 514 genes that were significantly associated with one or more  
221 environmental variables (Fig. 3; Supplementary Fig. 12; Supplementary Table 14). In  
222 general, we found that these environment-associated variants were widely distributed  
223 across the genome of *P. koreana* and did not cluster in specific regions.

224 LFMM is a univariate approach that tests for associations between one variant and  
225 one environmental variable at a time and to alleviate these issues we also used a  
226 complementary multivariate landscape genomic method, redundancy analysis (RDA)  
227<sup>29</sup>, to identify covarying variants that are likely associated with multivariate  
228 environment predictors. To avoid issues due to multicollinearity, six uncorrelated  
229 environmental variables (Spearman's  $r < 0.6$ , Supplementary Fig. 13) were selected for  
230 the RDA analyses, including three temperature variables (Annual Mean Temperature  
231 (BIO1), Isothermality (BIO3), Maximum Temperature of Warmest Month (BIO5)) and  
232 three precipitation variables (Precipitation of Wettest Month (BIO13), Precipitation  
233 Seasonality (BIO15), Precipitation of Coldest Quarter (BIO19)). Of the 3,435

234 significant variants identified in our LFMM analyses, 1,779 (1,554 SNPs, 206 Indels  
235 and 19 SVs) were found to display extreme loadings (standard deviation >3) along one  
236 or multiple RDA axes (details in Materials and Methods). These shared variants were  
237 regarded as “core adaptive variants” for local climate adaptation and they were broadly  
238 distributed across the genome (Supplementary Fig. 14). Significantly stronger genetic  
239 differentiation ( $F_{ST}$ ) were observed at these adaptive variants (Supplementary Fig. 15),  
240 indicating that spatially varying selection has likely driven population differentiation at  
241 climate-associated adaptive variants compared to random neutral genetic markers<sup>30,31</sup>.  
242 On average, we found that more adaptive variants were associated with precipitation-  
243 related compared to temperature-related variables (Supplementary Fig. 14).

244 Of the core adaptive variants, only 3.2% were non-synonymous and 2.0% were  
245 synonymous mutations, with all remaining variants being non-coding (Supplementary  
246 Table 15), indicating that adaptation to climate in *P. koreana* have primarily evolved as  
247 a result of selection acting on regulatory rather than on protein-coding changes<sup>32</sup>. In  
248 particular, we found a significant enrichment of climate adaptive variants located in  
249 the 5' UTR of genes (Supplementary Fig. 16). Moreover, 9.7% of the adaptive variants  
250 were found to be located within the regions of accessible chromatin as identified by  
251 transposase-accessible chromatin sequencing (ATAC-seq) (Supplementary Table 14),  
252 again suggesting that changes in cis-regulatory elements may play important roles in  
253 driving environmental adaptation in natural populations of *P. koreana*. To further assess  
254 the selection pressures acting on the climate adaptive variants, we calculated the  
255 standardized integrated haplotype score (iHS) across all common variants to identify  
256 loci with signatures of selective sweeps<sup>33</sup>. Our results show that climate-associated  
257 variants did not display stronger signatures of positive selection compared to randomly  
258 selected SNPs (Supplementary Fig. 17), suggesting that adaptation to local climate in  
259 *P. koreana* may largely arise by polygenic selection, characterized by subtle to moderate  
260 shifts in allele frequencies of many loci with small effect sizes<sup>34,35</sup>.

261 Together, we identified many well-studied genes involved in climate adaptation in

262 *P. koreana* (Supplementary Fig. 12; Supplementary Table 14 and 16), although no  
263 significant functional enrichment could be detected. For loci that are significantly  
264 involved in adaptation to precipitation-associated environmental variables, the  
265 distribution of allele frequencies in general showed similar patterns (Supplementary  
266 Fig. 18). A prime example of such a locus that is strongly associated with variation in  
267 precipitation during the wettest month is *CRL1* (Fig. 3a). It is a LOB-domain  
268 transcription factor that play an essential role in crown root formation and that has been  
269 shown to play a critical role in regulating root system architecture in response to  
270 flooding and drought stresses<sup>36,37</sup>. We found two tandem duplicates homologous to  
271 *Arabidopsis CRL1* in *P. koreana* (Fig. 3b), and we identified a total of 104 candidate  
272 adaptive variants (83 SNPs, 19 Indels and 2 SVs) located around these two genes  
273 (*Pokor12247*, *Pokor12248*). We choose one candidate adaptive SNP located in 5' UTR  
274 of *Pokor12247* (LG04:25159299) as an example to show the distribution pattern of  
275 allele frequencies (Fig. 3d). The T allele was mainly distributed in the southeast regions  
276 of the *P. koreana* distribution range that are characterized by heavy precipitation in the  
277 wettest month, whereas the C allele was almost fixed in areas experiencing low rainfall  
278 (Fig. 3f). To verify the potential function of *Pokor12247* in mediating adaptation to  
279 extreme precipitation, we performed qRT-PCR to profile its expression under  
280 submergence stress. Interestingly, we found that *Pokor12247* exhibited differential  
281 expression between genotypes in response to submergence stress treatment, with  
282 individuals carrying the TC genotype at LG04:25159299 displaying enhanced  
283 expression compared to individuals with the CC genotypes in response to submergence  
284 (Fig. 3h). This indicates that the haplotype carrying the T allele may be associated with  
285 increased tolerance to submergence in regions with high rainfall. Nevertheless, the  
286 relatively high degree of LD (Fig. 3i) at this region makes it hard to identify the true  
287 causal variant(s) that are involved in mediating environmental adaptation. Furthermore,  
288 we did not observe signals of strong recent selection at this locus<sup>38</sup>. The extended  
289 haplotype homozygosity (EHH) did not exhibit significant differences between

290 haplotypes carrying the T or the C allele at the focal SNP (Fig. 3g; the standardized  
291  $|iHS|$  score =1.693), which again supports a polygenic pattern of adaptation <sup>39</sup>. In  
292 addition, many other genes were also found to be involved in precipitation-associated  
293 adaptation (Supplementary Fig. 12, 18; Supplementary Table 14, 16), such as  
294 *Pokor27800*, which encodes a MYB transcription factor (orthologous to *MYB60*) that  
295 is essential for promoting stomata opening and closure in response to flooding and/or  
296 drought stresses <sup>40</sup>; *Pokor18547* is orthologous to *Arabidopsis DPL1* and encodes a  
297 sphingoid long-chain base-1-phosphate lyase, and this gene has been shown to be  
298 involved in the dehydration stress response <sup>41</sup>; Similarly, *Pokor25841*, encoding a  
299 SQUAMOSA promoter binding protein-like transcription factor orthologous to  
300 *Arabidopsis SPL12*, has been shown to be an important regulator of plant growth,  
301 development and stress responses <sup>42</sup>.

302 We also identified a set of temperature-associated loci, including genes  
303 orthologous to *Arabidopsis HMG1*, *PGP4*, *FAD5*, *EMB1507* showing similar allele  
304 frequency distribution patterns as we saw for the precipitation associated genes (Fig.  
305 3a; Supplementary Fig. 12, 19; Supplementary Table S14). A striking example of such  
306 a locus associated with variation in the maximum temperature of the warmest month  
307 was *Pokor17228*, which encodes a heat shock protein (HSP) orthologous to  
308 *Arabidopsis HSP60-3A* <sup>43</sup>. The rapid synthesis of HSPs induced by the heat stress can  
309 protect cells from heat damage and enable plants to obtain thermotolerance by  
310 stabilizing and helping refold heat-inactivated proteins <sup>44</sup>. Relatively high LD was  
311 found within the region surrounding this gene (Fig. 3m), including a total of 62  
312 candidate adaptive variants (59 SNPs, 2 Indels and 1 SV). We chose one candidate  
313 adaptive SNP located in an intronic region of *Pokor17228* (LG07: 4796402) for further  
314 exploration of allele frequency distribution patterns (Fig. 3e). Populations located in  
315 areas with relatively higher temperature of the warmest month of the year were more  
316 likely to carry the G allele, while the A allele was more likely to be observed in regions  
317 with low temperatures (Fig. 3j). To further explore the role of *Pokor17228* in the

318 response to heat stress, we examined the expression pattern of the two genotypes (GG  
319 vs AA) at the candidate SNP. The genotypes with the candidate warm-adapted allele  
320 (G) showed much higher expression than the A allele after two and three hours of heat  
321 stress treatment (Fig. 3l), indicating that *Pokor17228* is a likely candidate gene for heat  
322 stress tolerance in *P. koreana*. Similar to what is observed at most candidate adapted  
323 variants, we failed to detect signatures of strong recent selection signal at this locus (the  
324 standardized |iHS| score =1.661). Despite this, the haplotypes carrying the warm-  
325 adapted allele (G) had elevated EHH relative to the haplotypes carrying the other allele  
326 (A) (Fig. 3k), suggesting it might have experienced weak positive selection.

327 Taken together, our results support a polygenic model for local climate adaptation  
328 across natural populations of *P. koreana*. The thorough characterization of the genetic  
329 basis underlying ecological adaptation performed in this study offers promising  
330 information for predicting species response to future climate change <sup>12,14</sup>.

331

### 332 **Genomic vulnerability prediction to future climate change**

333 Based on the established contemporary genotype–environment relationships and  
334 the identified climate-associated genetic loci, we aim to make predictions of how  
335 populations of *P. koreana* will response to future climate change. To achieve this we  
336 used two complementary approaches to investigate the spatial pattern of maladaptation  
337 across the range of *P. koreana* and to identify populations that are most vulnerable to  
338 future climate shifts under four CMIP6 emission scenarios of shared socioeconomic  
339 pathway (SSP126, SSP245, SSP370 and SSP585) for two defined periods (2061-2080  
340 and 2081-2100) <sup>45</sup>. First, we calculated the risk of nonadaptedness (RONA) for each  
341 population based on the 19 environmental variables (Fig. 4; Supplementary Fig. 20).  
342 RONA measures the expected allele frequency shifts required to cope with future  
343 climate conditions after establishing a linear relationship between allele frequencies at  
344 environmentally associated variants and present climates <sup>16,46</sup>. As expected, for most  
345 environmental variables, RONA increases under more severe climate change scenarios,

346 with higher emissions leading to increased overall RONA values (i.e. SSP585 vs.  
347 SSP126, more details in Supplementary Table 17). Moreover, we found substantial  
348 variation in RONA estimates among different environmental variables, and for each  
349 variable, RONA values were also different across populations (Fig. 4; Supplementary  
350 Fig. 20; Supplementary Table 17). We choose predictions for two environmental  
351 variables (BIO5 and BIO13, described above) under future climate scenario SSP370 in  
352 2061-2080 as representative outcome. Populations located in areas with more drastic  
353 environmental changes are anticipated to have greater RONA values. RONA estimates  
354 for temperature variables were substantially higher than those projected from  
355 precipitation-induced responses, indicating that substantial allele frequency shifts are  
356 needed at temperature-associated loci to cope with future temperature increases (Fig. 4  
357 a,b; Supplementary Fig. 21)<sup>16</sup>. In addition, we found that populations in both the  
358 northern and southern distributions of *P. koreana* had almost equally large values of  
359 RONA in face of temperature changes. In contrast, for precipitation changes southern  
360 populations displayed much higher genomic vulnerability compared to northern  
361 populations where RONA values were generally low, in particular for those populations  
362 near the Korean Peninsula that were predicted to experience severe rainfall and extreme  
363 precipitation events in the future (Fig. 4 c,d).

364 Second, we used the gradient forest (GF) approach to model the turnover in allele  
365 frequencies along present environmental gradients and predict genetic offset to a  
366 projected future climate<sup>10</sup>. We first performed GF analyses to determine the relative  
367 importance of various environmental variables based on the putatively environmental-  
368 associated variants. Of the 19 environmental variables tested, the top explanatory  
369 variables were mostly precipitation related, again suggesting that adaptation to  
370 precipitation is likely the most important environmental driver shaping the spatial  
371 patterns of adaptive genetic variation (Fig. 5b). To avoid multicollinearity issues and to  
372 simultaneously consider the ranked importance by GF, we used the same six  
373 uncorrelated environmental variables that were used in the RDA analyses (BIO15,

374 BIO19, BIO13, BIO1, BIO3, BIO5) to estimate genomic vulnerability across the  
375 geographic distribution of *P. koreana*. By visualizing climate-associated genetic  
376 variation across the natural distribution of *P. koreana*, we found that adaptive genetic  
377 variation could be largely explained by these six climatic variables (Supplementary Fig.  
378 22). Moreover, we observed that the use of the six uncorrelated climatic variables or all  
379 the nineteen climatic variables had no major impact on the results (Supplementary Fig.  
380 23, 24). Overall, genomic offset was found to be highest in southeastern populations  
381 near the Korean Peninsula (Fig. 5a), where also high RONA values for both  
382 precipitation and temperature-related variables were observed (Fig. 4). Therefore, all  
383 these findings demonstrate that southeastern populations of *P. koreana* near the Korean  
384 Peninsula are expected to experience higher magnitudes of environmental change in  
385 the future, from both warmer temperatures and more extreme summer rainfall  
386 conditions, and are therefore likely to be more vulnerable to climate change <sup>14,17</sup>.

387 Although genomic information shows great promise for predicting future  
388 vulnerability of species to climate change, recent simulation studies revealed that the  
389 measures of potential genomic offset could be artificially inflated by other neutral  
390 processes such as population structure and effective populations sizes <sup>47</sup>. However, in  
391 our study, both RONA and genomic offset estimated here are all based on candidate  
392 climatic adaptive variants that were identified by genome scan procedures after  
393 accounting for the effects of neutral population structure. In addition, compared to the  
394 expectation that populations with small  $N_e$  would exhibit greater signatures of genetic  
395 drift that further leads to greater turnover of allele frequencies and cause false-positive  
396 signals of increased estimates of offsets <sup>47</sup>, we did not find a relationship between the  
397 level of nucleotide diversity, which is proportion to  $N_e$ , and the estimated genomic  
398 offsets across populations (Supplementary Fig. 25a). Furthermore, as higher genetic  
399 drift in small populations would limit the efficacy of purifying selection and result in  
400 higher genetic load <sup>48</sup>, we further estimated and compared genetic load using a measure  
401 that compare the proportion of 0-fold nonsynonymous to 4-fold synonymous SNPs



402 among populations. In line with the results on nucleotide diversity, there was no  
403 relationship between the estimated genetic load and offsets (Supplementary Fig. 25b).  
404 Together, all results suggest that neutral evolutionary processes should not have much  
405 impact on our estimates of genetic offsets and the vulnerability assessment across  
406 populations to future climate change.

407 The metrics of genomic vulnerability estimated here are therefore reliable and have  
408 clear implications for not only delineating future conservation units but also informing  
409 management decisions of this key long-lived tree species <sup>49</sup>. For instance, the  
410 southeastern populations nearby the Korean Peninsula are inferred to be most at risk  
411 from future higher temperatures and more intense precipitation. Considering that these  
412 populations contain many unique, climate-adaptive germplasms where a set of adaptive  
413 alleles for warmer and wetter climates have been identified in multiple functional  
414 important genes, *ex situ* conservation efforts may be appropriate and necessary in this  
415 area <sup>50</sup>.

416

## 417 **Conclusion**

418

419 Ongoing climate change is predicted to threaten populations for numerous species, and  
420 despite the importance of intraspecific adaptive variation in determining responses,  
421 predictions of vulnerability to climate change usually lack a component of evolutionary  
422 responses. In this study, we first assembled a highly continuous, accurate, and complete  
423 genome of *P. koreana* using Nanopore long reads and Hi-C interaction maps. The high-  
424 quality reference genome enables us to perform comprehensive population genomic  
425 analyses, which are fundamental for an accurate characterization of the spatial patterns  
426 of genomic variation and for gaining unique insights into the genetic architecture of  
427 climatic adaptation. We further combine genomics, space-for-time and machine-  
428 learning approaches to predict broad spatiotemporal responses to future climate change  
429 in this species. Most notably, we identify a set of populations located in southeastern



430 part of the current distribution range as being potentially most vulnerable under future  
431 climate scenarios, information which is invaluable for developing conservation and  
432 management strategies. To summarize, our results demonstrate how genomic data can  
433 be used to assess climate change vulnerability in an ecologically important non-model  
434 species, showing great promise as the first step in the design of applied conservation  
435 efforts in response to a rapidly changing climate.

436

## 437 **Materials and Methods**

438

### 439 **Plant materials and genome sequencing**

440 Fresh leaf tissues were sampled from a wild *P. koreana* plant growing in Changbai  
441 Mountain of Jilin province in China, and immediately stored in liquid nitrogen. Total  
442 genomic DNA was extracted using the CTAB method. For the Illumina short-read  
443 sequencing, paired-end libraries with insert sizes of 350bp were constructed and  
444 sequenced using an Illumina HiSeq X Ten platform. For the long-read sequencing, the  
445 genomic libraries with 20 Kbp insertions were constructed and sequenced utilizing the  
446 PromethION platform of Oxford Nanopore technologies. For the Hi-C experiment,  
447 about 3g of fresh young leaves of the same *P. koreana* accession was ground to  
448 powder in liquid nitrogen. A sequencing library was then constructed by chromatin  
449 extraction and digestion, DNA ligation, purification and fragmentation<sup>51</sup>, and was  
450 subsequent sequenced on an Illumina HiSeq X Ten platform.

451

### 452 **Genome assembly and scaffolding**

453 The quality-controlled reads were firstly corrected via a self-align method using the  
454 NextCorrect module in the software NextDenovo v2.0-beta.1  
455 (<https://github.com/Nextomics/NextDenovo>) with parameters “reads\_cutoff=1k,  
456 seed\_cutoff=32k”. Smartdenovo v1.0.0 (<https://github.com/ruanjue/smartdenovo>) was  
457 then used to assemble the draft genome with the options -k 21 -J 3000 -t 16. To improve

458 the accuracy of the draft assembly, two-step polishing strategies were applied: the first  
459 step included three rounds of polishing by Racon v1.3.1<sup>52</sup> based on the corrected ONT  
460 long reads. The second step includes four rounds of polishing by Nextpolish v1.0.5<sup>53</sup>  
461 based on cleaned Illumina short reads after removing adapters and low-quality reads  
462 using fastp v0.20.0<sup>54</sup> with parameters ‘-f 5 -F 5 -t 5 -T 5 -n 0 -q 20 -u 20’. Finally,  
463 allelic haplotigs were removed using the purge\_haplotigs v1.1.1<sup>55</sup> software with the  
464 options ‘-l 5 -m66 -h 170’ to obtain the final contig-level assembly.

465 For chromosome-level scaffolding, the Hi-C reads were first filtered by fastp  
466 v0.20.0 with parameters described above. Each pair of the clean reads were then aligned  
467 onto the contig-level assembly by bowtie2 v2.3.2<sup>56</sup> with parameters ‘-end-to-end, -  
468 very-sensitive -L 30’. The quality of Hi-C data was evaluated by HiC-Pro v2.11.4<sup>57</sup>,  
469 which further classified read-pairs as valid or invalid interaction pairs. Only valid  
470 interaction pairs were retained for further analysis. Finally, scaffolds were clustered,  
471 ordered and oriented onto chromosomes using LACHESIS<sup>58</sup> with parameters:  
472 CLUSTER MIN RE SITES = 100; CLUSTER MAX LINK DENSITY=2.5; CLUSTER  
473 NONINFORMATIVE RATIO = 1.4; ORDER MIN N RES IN TRUNK=60; ORDER  
474 MIN N RES IN SHREDS=60. The placement and orientation errors that exhibit  
475 obvious discrete chromosome interaction patterns were then manually adjusted.

476 The completeness of the genome assembly was assessed by both the representation  
477 of Illumina whole-genome sequencing short reads from mapping back reads to the  
478 assembly using bwa v0.7.12<sup>59</sup>, and by Benchmarking Universal Single-Copy  
479 Orthologs (BUSCO) v4.0.5<sup>60</sup> with the searching database of “embryophyte\_odb10”.

480

### 481 **Repeat and gene annotation**

482 For repeat annotation, we used the Extensive de-novo TE Annotator (EDTA v1.9.3)<sup>61</sup>,  
483 which incorporates well performed structure- and homology-based programs  
484 (including LTRharvest, LTR\_FINDER, LTR\_retriever, TIR-learner, HelitronScanner  
485 and RepeatModeler) and subsequent filtering scripts, for a comprehensive repeat

486 detection. Subsequently, TEsorter (v1.2.5, <https://github.com/zhangrengang/TEsorter/>)  
487 <sup>62</sup> was used to reclassify those TEs that were annotated as “LTR/unknown” by EDTA.

488 For gene annotation, we first used RepeatMasker v4.1.0 <sup>63</sup> to mask the whole  
489 genome sequences with the TE library constructed using EDTA. An integrated strategy  
490 that combined homology-based prediction, transcriptome-based prediction and *ab*  
491 *initio* prediction was used to predict the protein-coding genes. For homology-based  
492 gene prediction, published protein sequences of six plant species, including *Populus*  
493 *euphratica*, *Salix brachista*, *Salix purpurea*, *Populus trichocarpa*, *Arabidopsis thaliana*  
494 and *Vitis vinifera* were downloaded and aligned onto the repeat-masked genome by using  
495 TBLASTN (ncbi-BLAST v2.2.28 <sup>64</sup>) program with E-value cutoff setting  $1e^{-5}$ , and  
496 GeneWise v2.4.1 <sup>65</sup> was then used to predict gene models with default settings. For  
497 transcriptome-based gene prediction, trimmed RNA-seq reads from leaf, stem and bud  
498 tissues were mapped to the reference genome using HISAT v2.2.1 <sup>66</sup> with parameters  
499 “--max-intronlen 20000 --dta --score-min L, 0.0, -0.4”, and Trinity v2.8.4 <sup>67</sup> was used  
500 for transcripts assembly with default parameters. Assembled transcripts were  
501 subsequently aligned to the corresponding genome to predict gene structure using  
502 PASA v2.4.1 <sup>68</sup>. For the *ab initio* prediction, Augustus v3.3.2 <sup>69</sup> was employed using  
503 default parameters after incorporating the transcriptome-based and homology-based  
504 evidence for gene model training. Finally, all predictions of gene models generated  
505 from these approaches were integrated into the final consensus gene set using  
506 EvidenceModelerv1.1.1 <sup>68</sup>. After prediction, PASA was again used to update  
507 alternatively spliced isoforms to gene models and to produce a final gff3 file with three  
508 rounds of iteration.

509 In addition, we also performed noncoding RNAs (ncRNAs) annotation. Transfer  
510 RNAs (tRNAs) were identified using tRNAscan-SE v2.0.7 <sup>70</sup> with default parameters.  
511 Ribosomal RNAs (rRNAs) were identified by aligning rRNA genes of *P.*  
512 *trichocarpa\_v3.1* to the assembly using blast. The other three types of ncRNA  
513 (microRNA, small nuclear RNA and small nucleolar RNA) were identified using

514 Infernal v1.1.4 <sup>71</sup> by searching Rfam database v12.0 <sup>72</sup>.

515 For functional annotation, our predicted protein-coding genes were aligned to  
516 multiple public databases including NR, Swiss-Prot, TrEMBL <sup>73</sup>, COG and KOG using  
517 NCBI BLAST+ v.2.2.31 with E-value of 1e-5 as cutoff <sup>64</sup>. Motifs and domains were  
518 annotated by searching against InterProScan (release 5.32-71.0) <sup>74</sup>. Gene ontology (GO)  
519 terms and KEGG pathways of predicted sequences were assigned by InterProScan and  
520 KEGG Automatic Annotation Server, respectively <sup>75</sup>.

521

### 522 **Gene family clustering and phylogenetic analysis**

523 Protein sequences from 13 plant species, including *Populus koreana*, *Populus*  
524 *euphratica*, *Populus pruinosa*, *Populus trichocarpa*, *Populus deltoides*, *Populus*  
525 *tremula*, *Populus alba*, *Salix suchowensis*, *Salix pruinosa*, *Ricinus communis*,  
526 *Arabidopsis thaliana*, *Vitis vinifera* and *Oryza sativa*, were selected for gene family  
527 clustering. Genes with premature stop codons or encoding proteins shorter than 50  
528 amino acids were removed. For genes with alternative splicing variants, the longest  
529 transcript was selected to represent the gene. An all-against-all comparison was  
530 performed using BLASTP v2.5.0+ with e-value setting 1e<sup>-5</sup>, and OrthoFinder v2.5.2 <sup>76</sup>  
531 was used to further cluster gene families.

532 A total of 905 single-copy orthologous genes were extracted. The coding DNA  
533 sequence (CDS) alignments of each single-copy gene family were generated based on  
534 protein sequences aligned with MAFFT v7.475 <sup>77</sup> and poorly conserved blocks and  
535 gaps were trimmed by trimAl v1.4 <sup>78</sup> with default settings. Then, the consensus  
536 sequences were concatenated into a ‘super gene’ for each species, and RAxML v8.2.8  
537 <sup>79</sup> was used to construct a phylogenetic tree under the GTRGAMMA model with 1000  
538 bootstrap replicates, which was visualized by FigTree v1.4.4. Molecular dating was  
539 carried out using the MCMCTree program implemented in the PAML package v4.10.0  
540 <sup>80</sup> based on the calibration time for divergence between *O. sativa* and *A. thaliana* (mean:  
541 152 Mya) and between *A. thaliana* and *V. vinifera* (mean: 117 Mya) obtained from the

542 TimeTree database (<http://www.timetree.org>)<sup>81</sup>. Finally, we applied CAFE v4.2.1<sup>82</sup> to  
543 compute changes in gene families along each lineage of the phylogenetic tree under a  
544 random birth-and-death model. The expanded and contracted gene families in *P.*  
545 *koreana* relative to other species were subjected to functional analysis using GO  
546 enrichment.

547

#### 548 **Genome synteny and whole-genome duplication (WGD) analysis**

549 We selected four species (*P. euphratica*, *P. trichocarpa*, *P. tremula*, *S. purpurea*) from  
550 Salicaceae to determine whether *P. koreana* shared the same whole-genome duplication  
551 events as other Salicaceae species. Colinear genes and syntenic blocks within each  
552 genome and between genomes were inferred using all-versus-all BLASTP and MCScan  
553<sup>83</sup>, with syntenic blocks being defined as those with at least five syntenic genes.  
554 Synonymous substitutions per synonymous site (*Ks*) between colinear blocks was  
555 calculated for each pair of homologous genes using WGDI v0.4.5<sup>84</sup>. The median *Ks*  
556 values of each syntenic block were then selected and used for the distribution analysis  
557 after performing the evolutionary rate correction.

558

#### 559 **Genome resequencing, read mapping and variant calling**

560 A total of 230 individuals were collected from 24 natural populations, representing most  
561 natural habitats of *P. koreana*. Within each population, individuals were sampled after  
562 ensuring that sampled individuals were at least 100m apart from each other. Genomic  
563 DNA was extracted from leaf samples with Qiagen DNeasy plant kit. Whole genome  
564 paired-end sequencing was generated using the Illumina NovaSeq 6000 platform with  
565 a target coverage of 20× per individual.

566 For raw resequencing reads, we used Trimmomatic v0.36<sup>85</sup> to remove adapters  
567 and cut off bases from either the start or the end of reads if the base quality was < 20.  
568 Trimmed reads shorter than 36 bases were further discarded. After quality control, all  
569 high-quality reads were mapped to our *de novo* assembled *P. koreana* genome using the

570 BWA-MEM algorithm of bwa v.0.7.17<sup>59</sup> with default parameters. The alignment  
571 results were then processed by sorting and PCR duplicate marking using SAMtools  
572 v.1.9<sup>86</sup> and Picard v.2.18.11 (<http://broadinstitute.github.io/picard/>). For genetic variant  
573 identification, SNP and Indel calling was performed using Genome Analysis Toolkit  
574 (GATK v.4.0.5.1)<sup>87</sup> and its subcomponents HaplotypeCaller, CombineGVCFs and  
575 GenotypeGVCFs to form a merged VCF file with “all sites” (including nonvariant sites)  
576 included using the ‘EMIT\_ALL\_SITES’ flag. SV calling was performed using the  
577 software DELLY v0.8.3<sup>88</sup> with default parameters. We further performed multiple  
578 filtering steps to only retain high-quality variants for downstream analysis. For SNPs,  
579 SNPs with multi-alleles (>2) and those located at or within 5 bp from any indels were  
580 removed. In addition, after treating genotypes with read depth (DP) < 5 and genotype  
581 quality (GQ) < 10 as missing, SNPs with missing rate higher than 20% were filtered;  
582 for indels, those with multi-alleles (>2) and with QD < 2.0, FS > 200.0, SOR > 10.0,  
583 MQRankSum < -12.5, ReadPosRankSum < -8.0 were removed. Indels with missing  
584 rate >20% after treating genotype with DP<5 and GQ<10 as missing were further  
585 filtered out; for SVs, those with length < 50bp and with imprecise breakpoints (flag  
586 IMPRECISE) were removed. After treating genotypes with GQ<10 as missing, we  
587 further filtered SVs with missing rate >20%. Finally, we implemented the software  
588 SNPable (<http://lh3lh3.users.sourceforge.net/snpable.shtml>) to mask genomic regions  
589 where reads were not uniquely mapped and filtered out variants located in these regions.  
590 After these filtering steps, 16,619,620 SNPs, 2,663,202 indels and 90,357 SVs were  
591 remained for subsequent analyses. The filtered variants were further phased and  
592 imputed using Beagle v4.1<sup>89</sup> and the effects of individual variants were annotated using  
593 SnpEff v.4.3<sup>90</sup> with “-ud 2000” and other parameters set to default.

594

### 595 **Population structure analysis**

596 We first used PLINK v1.90<sup>91</sup> with the parameters “indep-pairwise 50 10 0.2” to extract  
597 a LD pruned SNP set with minor allele frequency (MAF) > 5%, which yielded 535,191

598 independent SNPs to be used in the population structure analysis. First, we used  
599 ADMIXTURE v.1.3.0<sup>92</sup> with default parameters to investigate population genetic  
600 structure across all individuals, with the number of clusters (K) being set from 1 to 8.  
601 Second, to quantify the relatedness between individuals, the identify-by-state (IBS)  
602 genetic distance matrix was calculated using “-distance 1-ibs” parameter in PLINK  
603 v1.90. We constructed a neighbor-joining (NJ) phylogenetic tree based on the distance  
604 matrix using MEGAX<sup>93</sup> and displayed the tree using FigTree v.1.4.4. Third, for the  
605 isolation-by-distance (IBD) analysis, we first used VCFtools v0.1.15<sup>94</sup> to calculate the  
606 population differentiation coefficient ( $F_{ST}$ ). The matrix of  $F_{ST}$  ( $F_{ST} (1 - F_{ST})$ ) and the  
607 matrix of geographic distance (km) among different groups of populations were then  
608 used for performing the Mantel tests using the R package “vegan”<sup>95</sup>, with the  
609 significance being determined based on 999 permutations.

610

### 611 **Genetic diversity, linkage disequilibrium and demographic history analysis**

612 To estimate and compare genetic diversity across populations of *P. koreana*, we  
613 calculated both intra-population ( $\pi$ ) and inter-population ( $d_{xy}$ ) nucleotide diversity after  
614 taking into account both polymorphic and monomorphic sites using the program pixy  
615 v0.95.0<sup>96</sup> over 100 Kbp nonoverlapping windows. In addition, Tajima’s D statistics  
616 were calculated using VCFtools v0.1.15 in 100 Kbp non-overlapping windows for the  
617 northern and southern groups of populations, respectively. To further estimate and  
618 compare the pattern of LD among different groups of populations, PopLDdecay v.3.40  
619<sup>97</sup> was used to calculate the squared correlation coefficient ( $r^2$ ) between pairwise SNPs  
620 with MAF >0.1 in a 100-kb window and then averaged across the whole genome.

621 PSMC<sup>98</sup> was used to infer historical changes in effective population size ( $N_e$ ) of *P.*  
622 *koreana* using parameters of -N25 -t15 -r5 -p "4+25\*2+4+6". We selected seven  
623 individuals from both the northern and southern groups of populations to run the PSMC  
624 analyses, and 100 bootstrap estimates were performed per individual. Assuming a  
625 generation time of 15 years and a mutation rate of  $3.75 \times 10^{-8}$  mutations per generation,



626 we converted the scaled population parameters into  $N_e$  and years.

627

## 628 **Identification of environment-associated genetic variants**

629 We used two different approaches to identify environment-associated variants (SNPs,  
630 indels, and SVs) across the whole genome. We only kept common variants with  
631 MAF >10%, including a total of 5,182,474 SNPs, 736,051 indels and 30,934 SVs, for  
632 these analyses. First, we used a univariate latent-factor linear mixed model (LFMM)  
633 implemented in the R package LEA v3.3.2<sup>99</sup> to search for associations between allele  
634 frequencies and the 19 BIOCLIM environmental variables<sup>100</sup>. Based on the number of  
635 ancestry clusters inferred with ADMIXTURE v.1.3.0, we ran LFMM with three latent  
636 factors to account for population structure in the genotype data. For each environmental  
637 variable, we ran five independent MCMC runs using 5000 iterations as burn-in  
638 followed by 10,000 iterations. *P*-values from all five runs were then averaged for each  
639 variant and adjusted for multiple tests using a false discovery rate (FDR) correction of  
640 5% as the significance cutoff. Second, we performed a redundancy analysis (RDA) to  
641 identify genetic variants showing especially strong relationship with multivariate  
642 environmental axes<sup>29,101</sup>. RDA has been demonstrated to be one of the best-performing  
643 multivariate genotype-environmental association approaches and which exhibits low  
644 false-positive rates<sup>29</sup>. Six uncorrelated environmental variables (BIO1, BIO3, BIO5,  
645 BIO13, BIO15 and BIO19) with pairwise correlation coefficients <0.6 were selected  
646 for the RDA analyses using the R package vegan v2.5-7. Significant environment-  
647 associated variants were defined as those having loadings in the tails of the distribution  
648 using a standard deviation cut-off of 3 along one or more RDA axes.

649 To further assess selection pressures acting on climate adaptive variants, we  
650 assessed the extended haplotype homozygosity (EHH) pattern for a selected set of  
651 strongly associated variants using the R package “rehh”<sup>102</sup>, and calculated the  
652 standardized integrated haplotype score (iHS) across the genome for common variants  
653 using the software selscan v.1.3.0<sup>103</sup>.



654

### 655 **Stress treatment and expression analysis by qRT-PCR**

656 Stem segments from wild genotypes of *P. koreana* were surface sterilized by soaking  
657 in 10% sodium hypochlorite solution and 70% Ethyl alcohol for 5 minutes, and then  
658 thoroughly washed five times with distilled water. The stem segments were inserted  
659 into MS medium (0.05mg/L NAA) for 30 d at 25/20 °C (day 16 h/night 8 h) and after  
660 rooting, the stem segments were transplanted to soil for 40 d at 25/20 °C (day 16 h/night  
661 8 h). To explore the effect of different genotypes of one candidate adaptive SNP located  
662 in the 5' UTR of *Pokor12247* (LG04:25159299) in mediating adaptation to extreme  
663 precipitation, we carried out a submergence treatment. For the submergence treatment,  
664 water was maintained at 2 cm above the soil surface and plants were maintained in the  
665 growth chamber providing 25 °C/20 °C (day 16 h/night 8 h) for 0h, 3h, 6h, 9h and 12  
666 h. In addition, we also carried out a heat stress treatment to explore the effect of one  
667 candidate adaptive SNP located in intronic region of *Pokor17228* (LG07: 4796402) in  
668 response to heat stress. For the heat stress treatment, plants were placed into a plant  
669 incubator at 42 °C/20 °C (day/night) with an illumination of 16 h/8 h (day/night) for 0  
670 h, 1 h, 2 h, 3 h and 24 h. At each time point, leaf tissues were collected from each plant  
671 at the same place and frozen immediately in liquid nitrogen for expression analyses.

672 Quantitative Reverse Transcription PCR (qRT-PCR) <sup>104</sup> was used to investigate the  
673 expression levels of selected genes in the abiotic treatments (*Pokor12247* for  
674 submergence stress; *Pokor17228* for heat stress). Total RNA was extracted from pooled  
675 leaf materials using a Plant RNA extract kit (Biofit, Chengdu, China), and the HiScript  
676 II RT SuperMix for qPCR kit (+gDNA wiper) (Vazyme, Nanjing, China) was used to  
677 obtain cDNA. qPCR was performed with gene-specific primers (Supplementary Table  
678 18) using the Taq Pro Universal SYBR qPCR Master Mix (Vazyme, Nanjing, China)  
679 reaction system on the CFX96 Real-Time detection system (Bio-Rad, CA, USA). Each  
680 experiment was performed with three technical replicates and the *UBQ10* was used as  
681 the endogenous control for data analysis.

682

### 683 **ATAC-seq analysis**

684 For the ATAC experiment, fresh leaf tissue were collected from the same individual  
685 used for the genome-assembly of *P. koreana* and prepared according to the  
686 experimental protocol following <sup>105</sup>. In brief, approximately 500mg of flash-frozen  
687 leaves were immediately chopped and processed for ATAC-seq, followed by library  
688 construction and were then subjected to sequencing on the Illumina HiSeq X-Ten  
689 platform (San Diego, CA, USA). The raw reads generated were first trimmed using  
690 Trimmomatic v.0.36 <sup>85</sup> with a maximum of two seed mismatches, and the adapters were  
691 trimmed by NexteraPE. Then the clean reads were aligned to the reference genome  
692 using Bowtie v.2.3.2 <sup>56</sup> using the following parameters: ‘bowtie2 --very-sensitive -N 1  
693 -p 4 -X 2000 -q’. Aligned reads were sorted using SAMtools v.1.1.1 <sup>86</sup>. The redundant  
694 reads from PCR amplification and reads that mapped to either chloroplast or  
695 mitochondria were removed using Picard v.2.18.11  
696 (<http://broadinstitute.github.io/picard/>). Finally, only high quality properly paired reads  
697 were retained for further analysis. ATAC-seq peak calling was done by MACS2 <sup>106</sup> with  
698 the ‘-keep dup all’ function.

699

### 700 **Genomic vulnerability assessment**

701 For each sampling location, we downloaded future (2061-2080 and 2081-2100)  
702 environmental data for the 19 BIOCLIM variables from WorldClim CMIP6 dataset  
703 (BCC-CSM2-MR model; resolution 2.5 arcmin) <sup>100</sup>. Each of the two future  
704 environmental datasets consists of four Shared Socio-economic Pathways (SSPs):  
705 SSP126, SSP245, SSP370 and SSP585. We used two different approaches to evaluate  
706 the genomic vulnerability to future climate change. First, we calculated the risk of  
707 nonadaptedness (RONA) <sup>16</sup>, which quantifies the theoretical average change in allele  
708 frequency needed to cope with climate change, under projected future climate scenarios.  
709 Following the method used in <sup>107</sup>, a linear relationship between allele frequencies at

710 significantly associated loci (detected by both LFMM and RDA) and environmental  
711 variables was first established using linear regressions. For each locus, population and  
712 environmental variable, the theoretical allele frequency change needed to cope with  
713 future climate conditions (RONA) were calculated, and the average RONA values were  
714 further weighted by the  $R^2$  for each linear regression following <sup>46</sup>. Second, as a  
715 complementary approach to RONA, we used a nonparametric, machine-learning  
716 gradient forest analysis to calculate genomic vulnerability across the range of *P.*  
717 *koreana* using ‘gradientForest’ in R <sup>10,108</sup>. We first built a GF model with 500 trees on  
718 the 19 BIOCLIM variables using the environmental-associated variants detected by  
719 both LFMM and RDA, which provided a ranked list of the relative importance of all  
720 environmental variables. Based on the ranked importance and pairwise correlation  
721 coefficients of the nineteen variables, we selected six unrelated environmental variables  
722 (BIO1, BIO3, BIO5, BIO13, BIO15 and BIO19, identical to the RDA analyses) to build  
723 a second gradient forest model for estimating the genetic offset under the different  
724 future scenarios. The genetic offset was calculated as a metric for the Euclidean  
725 distance of the genomic composition between the current and future projected climates,  
726 and then mapped with ArcGIS 10.2 to display its’ geographical distribution.

727

## 728 **Funding**

729

730 This project was supported by National Natural Science Foundation of China  
731 (31971567) and Fundamental Research Funds for the Central Universities (YJ201936,  
732 SCU2020D003, SCU2021D006).

733

## 734 **Author contributions**

735

736 J.W., K.M. and J.L. conceived the research. J.W. supervised the study. Y.S., H.Z., K.M.  
737 performed the sampling and collected the materials. Y.S., Z.L., T.S., C.J. X.Z., Q.L.,

738 G.Y., X.X. conducted all bioinformatics analyses. X.D., J.F., H.L. and Y.J. performed  
739 the experiment. Y.S. Z.L. and J.W. wrote the manuscript, with the input from P.K.I and  
740 J.L. All authors approved the final manuscript.

741

## 742 **Competing interests**

743

744 The authors declare that they have no competing interests.

745

## 746 **Data availability**

747

748 All data needed to evaluate the conclusions in the paper are present in the paper and/or  
749 the Supplementary Materials. All sequencing data in this study will be deposited in  
750 National Genomics Data Center (NGDC) and/or NCBI during reviewing process. All  
751 scripts used in this study will be available at  
752 [https://github.com/jingwanglab/Populus\\_genomic\\_prediction\\_climate\\_vulnerability](https://github.com/jingwanglab/Populus_genomic_prediction_climate_vulnerability)  
753 upon publication.

754

## 755 **Reference**

- 756 1. Walther, G.R. *et al.* Ecological responses to recent climate change. *Nature* **416**, 389-395 (2002).
- 757 2. Aitken, S.N., Yeaman, S., Holliday, J.A., Wang, T. & Curtis-McLane, S. Adaptation, migration or  
758 extirpation: climate change outcomes for tree populations. *Ecol. Appl.* **1**, 95-111 (2008).
- 759 3. Exposito-Alonso, M., Burbano, H.A., Bossdorf, O., Nielsen, R. & Weigel, D. Natural selection on  
760 the *Arabidopsis thaliana* genome in present and future climates. *Nature* **573**, 126-129 (2019).
- 761 4. Waldvogel, A.M. *et al.* Evolutionary genomics can improve prediction of species' responses to  
762 climate change. *Ecol. Lett.* **4**, 4-18 (2020).
- 763 5. Browne, L., Wright, J.W., Fitz-Gibbon, S., Gugger, P.F. & Sork, V.L. Adaptational lag to  
764 temperature in valley oak (*Quercus lobata*) can be mitigated by genome-informed assisted gene  
765 flow. *Proc. Natl. Acad. Sci. U.S.A.* **116**, 25179-25185 (2019).
- 766 6. Kawecki, T.J. & Ebert, D. Conceptual issues in local adaptation. *Ecol. Lett.* **7**, 1225-1241 (2004).
- 767 7. Anderson, J.T., Willis, J.H. & Mitchell-Olds, T. Evolutionary genetics of plant adaptation. *Trends*  
768 *Genet.* **27**, 258-266 (2011).
- 769 8. Williams, S.E., Shoo, L.P., Isaac, J.L., Hoffmann, A.A. & Langham, G. Towards an integrated  
770 framework for assessing the vulnerability of species to climate change. *PLoS Biol.* **6**, e325 (2008).

- 771 9. Neale, D.B. & Kremer, A. Forest tree genomics: growing resources and applications. *Nat. Rev.*  
772 *Genet.* **12**, 111-122 (2011).
- 773 10. Fitzpatrick, M.C. & Keller, S.R. Ecological genomics meets community-level modelling of  
774 biodiversity: Mapping the genomic landscape of current and future environmental adaptation.  
775 *Ecol. Lett.* **18**, 1-16 (2015).
- 776 11. Bay, R.A. *et al.* Genomic signals of selection predict climate-driven population declines in a  
777 migratory bird. *Science* **359**, 83-86 (2018).
- 778 12. Hoffmann, A.A., Weeks, A.R. & Sgrò, C.M. Opportunities and challenges in assessing climate  
779 change vulnerability through genomics. *Cell* **184**, 1420-1425 (2021).
- 780 13. Tiffin, P. & Ross-Ibarra, J. Advances and limits of using population genetics to understand local  
781 adaptation. *Trends Ecol Evol.* **29**, 673-680 (2014).
- 782 14. Capblancq, T., Fitzpatrick, M.C., Bay, R.A., Exposito-Alonso, M. & Keller, S.R. Genomic  
783 prediction of (mal) adaptation across current and future climatic landscapes. *Annu. Rev. Ecol.*  
784 *Evol. Syst.* **51**, 245-269 (2020).
- 785 15. Lotterhos, K.E. & Whitlock, M.C. The relative power of genome scans to detect local adaptation  
786 depends on sampling design and statistical method. *Mol. Ecol.* **24**, 1031-1046 (2015).
- 787 16. Rellstab, C. *et al.* Signatures of local adaptation in candidate genes of oaks (*Quercus* spp.) with  
788 respect to present and future climatic conditions. *Mol. Ecol.* **25**, 5907-5924 (2016).
- 789 17. Rellstab, C., Dauphin, B. & Exposito-Alonso, M. Prospects and limitations of genomic offset in  
790 conservation management. *Ecol. Appl.* **14**, 1202-1212 (2021).
- 791 18. Supple, M.A. *et al.* Landscape genomic prediction for restoration of a Eucalyptus foundation  
792 species under climate change. *Elife* **7**, e31835 (2018).
- 793 19. Isabel, N., Holliday, J.A. & Aitken, S.N. Forest genomics: Advancing climate adaptation, forest  
794 health, productivity, and conservation. *Ecol. Appl.* **13**, 3-10 (2020).
- 795 20. Gougherty, A.V., Keller, S.R. & Fitzpatrick, M.C. Maladaptation, migration and extirpation fuel  
796 climate change risk in a forest tree species. *Nat. Clim. Change* **11**, 166-171 (2021).
- 797 21. Formenti, G. *et al.* The era of reference genomes in conservation genomics. *Trends Ecol Evol.* **37**,  
798 197-202 (2022).
- 799 22. Marks, R.A., Hotaling, S., Frandsen, P.B. & VanBuren, R. Representation and participation across  
800 20 years of plant genome sequencing. *Nat. Plants* **7**, 1571-1578 (2021).
- 801 23. Holliday, J.A. *et al.* Advances in ecological genomics in forest trees and applications to genetic  
802 resources conservation and breeding. *Mol. Ecol.* **26**, 706-717 (2017).
- 803 24. Tuskan, G.A. *et al.* The genome of black cottonwood, *Populus trichocarpa* (Torr. & Gray).  
804 *Science* **313**, 1596-1604 (2006).
- 805 25. Ye, J., Yuan, Y., Cai, L. & Wang, X. Research progress of phylogeographic studies of plant species  
806 in temperate coniferous and broadleaf mixed forests in Northeastern China. *Biodiv Sci.* **25**, 1339  
807 (2017).
- 808 26. Slatkin, M. Isolation by distance in equilibrium and non-equilibrium populations. *Evolution* **47**,  
809 264-279 (1993).
- 810 27. Ho, S.S., Urban, A.E. & Mills, R.E. Structural variation in the sequencing era. *Nat. Rev. Genet.*  
811 **21**, 171-189 (2020).
- 812 28. Frichot, E., Schoville, S.D., Bouchard, G. & François, O. Testing for associations between loci

- 813 and environmental gradients using latent factor mixed models. *Mol. Biol. Evol.* **30**, 1687-1699  
814 (2013).
- 815 29. Capblancq, T. & Forester, B.R. Redundancy analysis: A Swiss Army Knife for landscape  
816 genomics. *Methods Ecol. Evol.* **12**, 2298-2309 (2021).
- 817 30. Savolainen, O., Lascoux, M. & Merilä, J. Ecological genomics of local adaptation. *Nat. Rev.*  
818 *Genet.* **14**, 807-820 (2013).
- 819 31. Savolainen, O., Pyhäjärvi, T. & Knürr, T. Gene flow and local adaptation in trees. *Annu. Rev. Ecol.*  
820 *Evol. Syst.* **38**, 595-619 (2007).
- 821 32. Schmitz, R.J., Grotewold, E. & Stam, M. Cis-regulatory sequences in plants: Their importance,  
822 discovery, and future challenges. *Plant Cell* **34**, 718-741 (2022).
- 823 33. Voight, B.F., Kudaravalli, S., Wen, X. & Pritchard, J.K. A map of recent positive selection in the  
824 human genome. *PLoS Biol.* **4**, e72 (2006).
- 825 34. Fagny, M. & Austerlitz, F. Polygenic adaptation: integrating population genetics and gene  
826 regulatory networks. *Trends Genet.* **37**, 631-638 (2021).
- 827 35. Yeaman, S. Evolution of polygenic traits under global vs local adaptation. *Genetics* **220**, iyab134  
828 (2022).
- 829 36. Inukai, Y. *et al.* Crown rootless1, which is essential for crown root formation in rice, is a target of  
830 an AUXIN RESPONSE FACTOR in auxin signaling. *Plant Cell* **17**, 1387-1396 (2005).
- 831 37. Coudert, Y. *et al.* Identification of CROWN ROOTLESS 1-regulated genes in rice reveals specific  
832 and conserved elements of postembryonic root formation. *New Phytol.* **206**, 243-254 (2015).
- 833 38. Sabeti, P.C. *et al.* Detecting recent positive selection in the human genome from haplotype  
834 structure. *Nature* **419**, 832-837 (2002).
- 835 39. Höllinger, I., Pennings, P.S. & Hermisson, J. Polygenic adaptation: From sweeps to subtle  
836 frequency shifts. *PLoS Genet.* **15**, e1008035 (2019).
- 837 40. Negi, J. *et al.* A Dof transcription factor, SCAP1, is essential for the development of functional  
838 stomata in Arabidopsis. *Curr. Biol.* **23**, 479-484 (2013).
- 839 41. Nishikawa, M. *et al.* Degradation of sphingoid long-chain base 1-phosphates (LCB-1Ps):  
840 functional characterization and expression of AtDPL1 encoding LCB-1P lyase involved in the  
841 dehydration stress response in Arabidopsis. *Plant Cell Physiol.* **49**, 1758-1763 (2008).
- 842 42. Chao, L.-M. *et al.* Arabidopsis transcription factors SPL1 and SPL12 confer plant thermotolerance  
843 at reproductive stage. *Mol. Plant* **10**, 735-748 (2017).
- 844 43. Rikhvanov, E.G. *et al.* Nuclear-mitochondrial cross-talk during heat shock in Arabidopsis cell  
845 culture. *Plant J.* **52**, 763-778 (2007).
- 846 44. Vierling, E. The roles of heat shock proteins in plants. *Annu. Rev. Plant Biol.* **42**, 579-620 (1991).
- 847 45. Feng, L. *et al.* The generation of gridded emissions data for CMIP6. *Geosci. Model Dev.* **13**, 461-  
848 482 (2020).
- 849 46. Pina-Martins, F., Baptista, J., Pappas Jr, G. & Paulo, O.S. New insights into adaptation and  
850 population structure of cork oak using genotyping by sequencing. *Glob. Change Biol.* **25**, 337-350  
851 (2019).
- 852 47. Láruson, Á.J., Fitzpatrick, M.C., Keller, S.R., Haller, B.C. & Lotterhos, K.E. Seeing the Forest for  
853 the trees: Assessing genetic offset predictions with Gradient Forest. *Ecol. Appl.* **00**, 1-14 (2022).
- 854 48. Bertorelle, G. *et al.* Genetic load: genomic estimates and applications in non-model animals. *Nat.*



- 855 *Rev. Genet.*, 1-12 (2022).
- 856 49. Seaborn, T., Griffith, D., Kliskey, A. & Caudill, C.C. Building a bridge between adaptive capacity  
857 and adaptive potential to understand responses to environmental change. *Glob. Change Biol.* **27**,  
858 2656-2668 (2021).
- 859 50. Gaitán-Espitia, J.D. & Hobday, A.J. Evolutionary principles and genetic considerations for  
860 guiding conservation interventions under climate change. *Glob. Change Biol.* **27**, 475-488 (2021).
- 861 51. Lieberman-Aiden, E. *et al.* Comprehensive mapping of long-range interactions reveals folding  
862 principles of the human genome. *Science* **326**, 289-293 (2009).
- 863 52. Vaser, R., Sović, I., Nagarajan, N. & Šikić, M. Fast and accurate de novo genome assembly from  
864 long uncorrected reads. *Genome Res.* **27**, 737-746 (2017).
- 865 53. Hu, J., Fan, J., Sun, Z. & Liu, S. NextPolish: a fast and efficient genome polishing tool for long-  
866 read assembly. *Bioinformatics* **36**, 2253–2255 (2020).
- 867 54. Chen, S., Zhou, Y., Chen, Y. & Gu, J. fastp: an ultra-fast all-in-one FASTQ preprocessor.  
868 *Bioinformatics* **34**, i884-i890 (2018).
- 869 55. Roach, M.J., Schmidt, S.A. & Borneman, A.R. Purge Haplotigs: allelic contig reassignment for  
870 third-gen diploid genome assemblies. *BMC Bioinformatics* **19**, 1-10 (2018).
- 871 56. Langmead, B. & Salzberg, S.L. Fast gapped-read alignment with Bowtie 2. *Nat. Methods* **9**, 357-  
872 359 (2012).
- 873 57. Servant, N. *et al.* HiC-Pro: an optimized and flexible pipeline for Hi-C data processing. *Genome*  
874 *Biol.* **16**, 1-11 (2015).
- 875 58. Burton, J.N. *et al.* Chromosome-scale scaffolding of de novo genome assemblies based on  
876 chromatin interactions. *Nat. Biotechnol.* **31**, 1119-1125 (2013).
- 877 59. Li, H. Aligning sequence reads, clone sequences and assembly contigs with BWA-MEM.  
878 *arXiv:1303.3997* (2013).
- 879 60. Simão, F.A., Waterhouse, R.M., Ioannidis, P., Kriventseva, E.V. & Zdobnov, E.M. BUSCO:  
880 assessing genome assembly and annotation completeness with single-copy orthologs.  
881 *Bioinformatics* **31**, 3210-3212 (2015).
- 882 61. Ou, S. *et al.* Benchmarking transposable element annotation methods for creation of a  
883 streamlined, comprehensive pipeline. *Genome Biol.* **20**, 1-18 (2019).
- 884 62. Zhang, R.-G. *et al.* TESorter: an accurate and fast method to classify LTR retrotransposons in plant  
885 genomes. *Hortic. Res.* uhac017 (2022).
- 886 63. Chen, N. Using Repeat Masker to identify repetitive elements in genomic sequences. *Curr.*  
887 *Protoc. Bioinformatics* Chapter 4, Unit 4.10 (2004).
- 888 64. Camacho, C. *et al.* BLAST+: architecture and applications. *BMC Bioinformatics* **10**, 1-9 (2009).
- 889 65. Birney, E., Clamp, M. & Durbin, R. GeneWise and genomewise. *Genome Res.* **14**, 988-995  
890 (2004).
- 891 66. Kim, D., Langmead, B. & Salzberg, S.L. HISAT: a fast spliced aligner with low memory  
892 requirements. *Nat. Methods* **12**, 357-360 (2015).
- 893 67. Haas, B.J. *et al.* De novo transcript sequence reconstruction from RNA-seq using the Trinity  
894 platform for reference generation and analysis. *Nat. Protoc.* **8**, 1494-1512 (2013).
- 895 68. Haas, B.J. *et al.* Automated eukaryotic gene structure annotation using EVIDENCEModeler and the  
896 Program to Assemble Spliced Alignments. *Genome Biol.* **9**, 1-22 (2008).

- 897 69. Stanke, M. & Morgenstern, B. AUGUSTUS: a web server for gene prediction in eukaryotes that  
898 allows user-defined constraints. *Nucleic Acids Res.* **33**, W465-W467 (2005).
- 899 70. Lowe, T.M. & Eddy, S.R. tRNAscan-SE: a program for improved detection of transfer RNA genes  
900 in genomic sequence. *Nucleic Acids Res.* **25**, 955-964 (1997).
- 901 71. Nawrocki, E.P. & Eddy, S.R. Infernal 1.1: 100-fold faster RNA homology searches.  
902 *Bioinformatics* **29**, 2933-2935 (2013).
- 903 72. Griffiths-Jones, S., Bateman, A., Marshall, M., Khanna, A. & Eddy, S.R. Rfam: an RNA family  
904 database. *Nucleic Acids Res.* **31**, 439-441 (2003).
- 905 73. Boeckmann, B. *et al.* The SWISS-PROT protein knowledgebase and its supplement TrEMBL in  
906 2003. *Nucleic Acids Res.* **31**, 365-370 (2003).
- 907 74. Jones, P. *et al.* InterProScan 5: genome-scale protein function classification. *Bioinformatics* **30**,  
908 1236-1240 (2014).
- 909 75. Moriya, Y., Itoh, M., Okuda, S., Yoshizawa, A.C. & Kanehisa, M. KAAS: an automatic genome  
910 annotation and pathway reconstruction server. *Nucleic Acids Res.* **35**, W182-W185 (2007).
- 911 76. Emms, D.M. & Kelly, S. OrthoFinder: phylogenetic orthology inference for comparative  
912 genomics. *Genome Biol.* **20**, 1-14 (2019).
- 913 77. Katoh, K. & Standley, D.M. MAFFT multiple sequence alignment software version 7:  
914 improvements in performance and usability. *Mol. Biol. Evol.* **30**, 772-780 (2013).
- 915 78. Capella-Gutiérrez, S., Silla-Martínez, J.M. & Gabaldón, T. trimAl: a tool for automated alignment  
916 trimming in large-scale phylogenetic analyses. *Bioinformatics* **25**, 1972-1973 (2009).
- 917 79. Stamatakis, A. RAxML version 8: a tool for phylogenetic analysis and post-analysis of large  
918 phylogenies. *Bioinformatics* **30**, 1312-1313 (2014).
- 919 80. Yang, Z. PAML 4: phylogenetic analysis by maximum likelihood. *Mol. Biol. Evol.* **24**, 1586-1591  
920 (2007).
- 921 81. Hedges, S.B., Dudley, J. & Kumar, S. TimeTree: a public knowledge-base of divergence times  
922 among organisms. *Bioinformatics* **22**, 2971-2972 (2006).
- 923 82. Han, M.V., Thomas, G.W., Lugo-Martínez, J. & Hahn, M.W. Estimating gene gain and loss rates  
924 in the presence of error in genome assembly and annotation using CAFE 3. *Mol. Biol. Evol.* **30**,  
925 1987-1997 (2013).
- 926 83. Wang, Y. *et al.* MCScanX: a toolkit for detection and evolutionary analysis of gene synteny and  
927 collinearity. *Nucleic Acids Res.* **40**, e49-e49 (2012).
- 928 84. Sun, P. *et al.* WGDI: a user-friendly toolkit for evolutionary analyses of whole-genome  
929 duplications and ancestral karyotypes. Preprint at *bioRxiv*  
930 <https://doi.org/10.1101/2021.04.29.441969> (2021).
- 931 85. Bolger, A.M., Lohse, M. & Usadel, B. Trimmomatic: a flexible trimmer for Illumina sequence  
932 data. *Bioinformatics* **30**, 2114-2120 (2014).
- 933 86. Li, H. *et al.* The sequence alignment/map format and SAMtools. *Bioinformatics* **25**, 2078-2079  
934 (2009).
- 935 87. DePristo, M.A. *et al.* A framework for variation discovery and genotyping using next-generation  
936 DNA sequencing data. *Nat. Genet.* **43**, 491-498 (2011).
- 937 88. Rausch, T. *et al.* DELLY: structural variant discovery by integrated paired-end and split-read  
938 analysis. *Bioinformatics* **28**, i333-i339 (2012).



- 939 89. Browning, B.L. & Browning, S.R. A unified approach to genotype imputation and haplotype-  
940 phase inference for large data sets of trios and unrelated individuals. *Am. J. Hum. Genet.* **84**, 210-  
941 223 (2009).
- 942 90. Cingolani, P. *et al.* A program for annotating and predicting the effects of single nucleotide  
943 polymorphisms, SnpEff: SNPs in the genome of *Drosophila melanogaster* strain w1118; iso-2; iso-  
944 3. *Fly* **6**, 80-92 (2012).
- 945 91. Purcell, S. *et al.* PLINK: a tool set for whole-genome association and population-based linkage  
946 analyses. *Am. J. Hum. Genet.* **81**, 559-575 (2007).
- 947 92. Alexander, D.H., Novembre, J. & Lange, K. Fast model-based estimation of ancestry in unrelated  
948 individuals. *Genome Res.* **19**, 1655-1664 (2009).
- 949 93. Kumar, S., Stecher, G., Li, M., Knyaz, C. & Tamura, K. MEGA X: molecular evolutionary  
950 genetics analysis across computing platforms. *Mol. Biol. Evol.* **35**, 1547 (2018).
- 951 94. Danecek, P. *et al.* The variant call format and VCFtools. *Bioinformatics* **27**, 2156-2158 (2011).
- 952 95. Oksanen, J. *et al.* vegan: community ecology package. R package version 2.5-7 (2013).
- 953 96. Korunes, K.L. & Samuk, K. pixy: Unbiased estimation of nucleotide diversity and divergence in  
954 the presence of missing data. *Mol. Ecol. Resour.* **21**, 1359-1368 (2021).
- 955 97. Zhang, C., Dong, S.-S., Xu, J.-Y., He, W.-M. & Yang, T.-L. PopLDdecay: a fast and effective tool  
956 for linkage disequilibrium decay analysis based on variant call format files. *Bioinformatics* **35**,  
957 1786-1788 (2019).
- 958 98. Li, H. & Durbin, R. Inference of human population history from individual whole-genome  
959 sequences. *Nature* **475**, 493-496 (2011).
- 960 99. Fricot, E. & François, O. LEA: An R package for landscape and ecological association studies.  
961 *Methods Ecol. Evol.* **6**, 925-929 (2015).
- 962 100. Fick, S.E. & Hijmans, R.J. WorldClim 2: new 1-km spatial resolution climate surfaces for global  
963 land areas. *Int. J. Climatol.* **37**, 4302-4315 (2017).
- 964 101. Van Den Wollenberg, A.L. Redundancy analysis an alternative for canonical correlation analysis.  
965 *Psychometrika* **42**, 207-219 (1977).
- 966 102. Gautier, M. & Vitalis, R. reh: an R package to detect footprints of selection in genome-wide SNP  
967 data from haplotype structure. *Bioinformatics* **28**, 1176-1177 (2012).
- 968 103. Szpiech, Z.A. & Hernandez, R.D. selscan: an efficient multithreaded program to perform EHH-  
969 based scans for positive selection. *Mol. Biol. Evol.* **31**, 2824-2827 (2014).
- 970 104. Livak, K.J. & Schmittgen, T.D. Analysis of relative gene expression data using real-time  
971 quantitative PCR and the 2(-Delta Delta C(T)) Method. *Methods* **25**, 402-408 (2001).
- 972 105. Bajic, M., Maher, K.A. & Deal, R.B. Identification of open chromatin regions in plant genomes  
973 using ATAC-Seq. *Methods Mol. Biol.* **1675**, 183-201 (2018).
- 974 106. Zhang, Y. *et al.* Model-based analysis of ChIP-Seq (MACS). *Genome Biol.* **9**, 1-9 (2008).
- 975 107. Dauphin, B. *et al.* Genomic vulnerability to rapid climate warming in a tree species with a long  
976 generation time. *Glob. Change Biol.* **27**, 1181-1195 (2021).
- 977 108. Ellis, N., Smith, S.J. & Pitcher, C.R. Gradient forests: calculating importance gradients on  
978 physical predictors. *Ecology* **93**, 156-168 (2012).

979

980

981 **Figures**

982

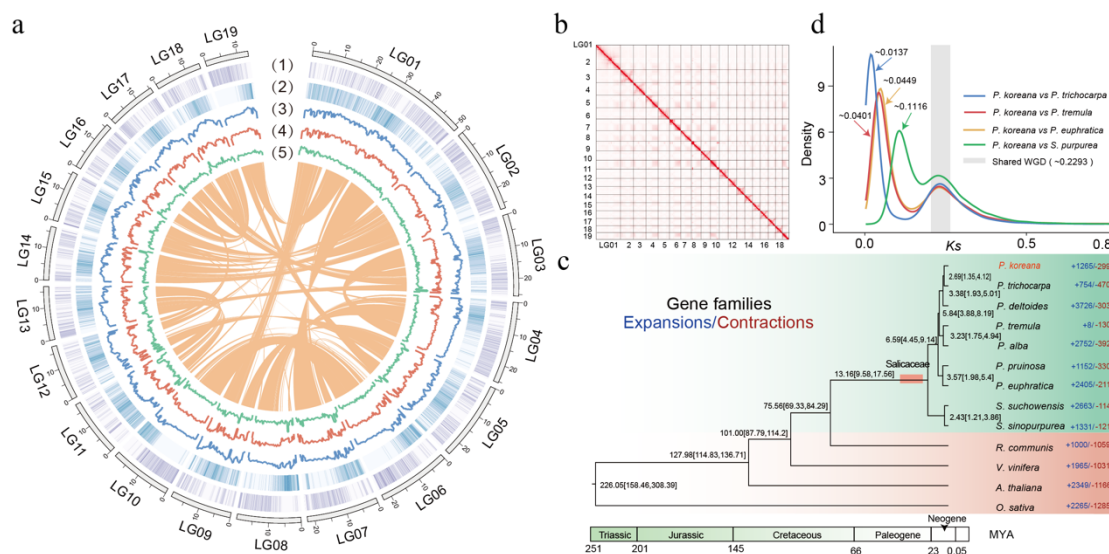

983

984 **Fig. 1 Genome assembly of *Populus koreana* and evolutionary analyses in the *Salicaceae*. a**

985 Landscape of genomic features and genetic diversity in *P. koreana*. Circles represent, from

986 outermost to innermost, gene density (1), transposable element density (2), the distribution of SNPs

987 (3), Indels (4) and SVs (5) estimated from the population genomic data. Lines in the center

988 represents the intra-genome collinear blocks. **b** Hi-C heatmap showing chromatin interactions at

989 100 Kb resolution in *P. koreana*. **c** Phylogenetic tree of *P. koreana* and 12 other eudicot species.

990 The number of gene families that expanded (blue) and contracted (red) in each lineage after

991 speciation are indicated beside the tree. The red box indicates the base of the *Salicaceae*. The

992 numbers above nodes in the tree represents divergence times between lineages (million years ago,

993 Mya). **d** Distribution of synonymous substitution rate (*Ks*) between syntenic blocks of five species:

994 *P. koreana*, *P. trichocarpa*, *P. tremula*, *P. euphratica* and *S. purpurea*.

995

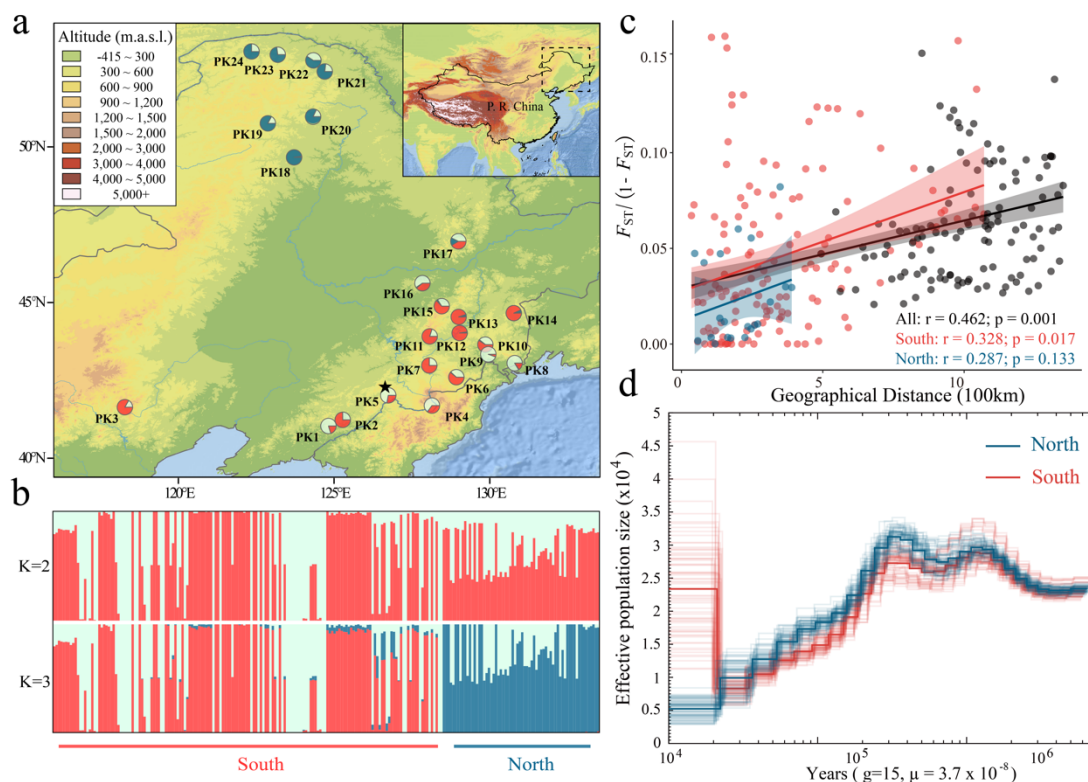

996

997 **Fig. 2 Population genomic analyses of *Populus koreana*.** **a** Geographic distribution of 24 natural

998 populations (*circles*) where colors represent ancestral components inferred by ADMIXTURE

999 (according to the substructure at  $K = 3$ ). The location of the individual selected for genome assembly

1000 is indicated by a black star. **b** Model-based population assignment using ADMIXTURE for  $K = 2$

1001 and 3. The height of each colored segment represents the proportion of the individual's genome

1002 derived from the inferred ancestral lineages. **c** Isolation-by-distance analyses (Mantel's test) for

1003 southern (red dots and line), northern (blue dots and line) and all populations (black dots and line),

1004 respectively. **d** Inferred demographic history of southern (blue lines) and northern groups (red lines)

1005 of populations from the PSMC model. Bold lines are the median estimates for the seven selected

1006 individuals from each of the two groups, whereas faint lines are 140 bootstrap replicates, with 10

1007 replicates being conducted for each of the selected individuals from the two groups.

1008

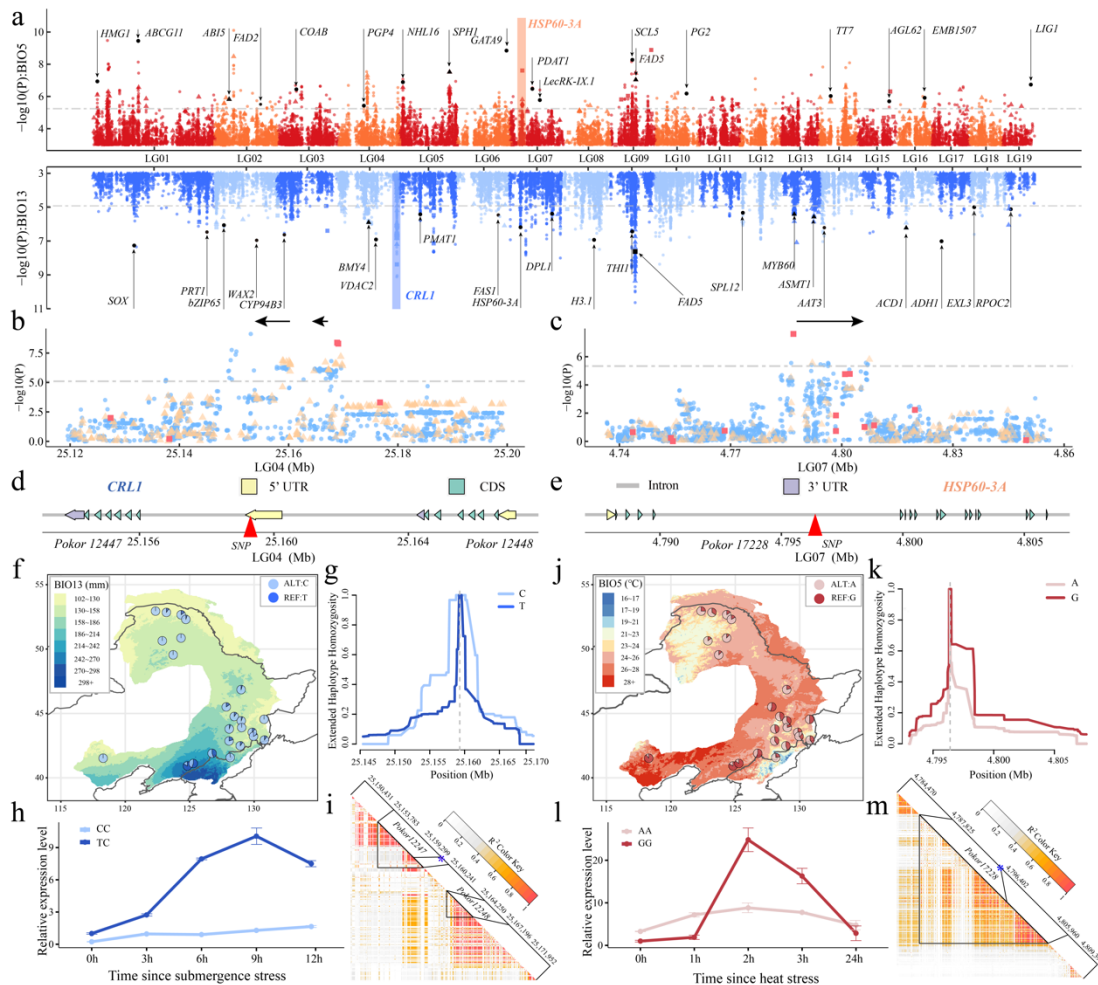

1009

1010 **Fig. 3 Genome-wide screening of the loci associated with local environmental adaptation. a**

1011 Manhattan plots for variants associated with the Maximum Temperature of Warmest Month (BIO5)

1012 (red, upper panels) and the Precipitation of Wettest Month (BIO13) (blue, lower panels). Dashed

1013 horizontal lines represent significance thresholds. Different chromosomes are distinguished by

1014 different shades of the major color. Selected candidate genes are labeled in the plot at their

1015 respective genomic positions. **b,c** Local manhattan plots around two candidate genes (black arrows),

1016 *CRL1* (*Pokor12447* and *Pokor12448*) and *HSP60-3A* (*Pokor17228*) on chromosome 4 and 7,

1017 associated with BIO5 and BIO13 respectively. SNPs, Indels and SVs are represented by blue dots,

1018 yellow triangles and red squares, separately. **d,e** The gene structure of selected genes, with the two

1019 representative candidate SNPs corresponding to the sites shown in **f-m** are marked by red triangles,

1020 respectively. **f,j** Allele frequencies of the candidate SNPs associated with BIO5 (**f** LG04:25159299)

1021 or BIO13 (**j** LG07: 4796402). Colors on the map are based on variation in the relevant climate

1022 variables across the distribution range. **g,k** Decay of extended haplotype homozygosity (EHH) for  
1023 the two alternative alleles at the two representative SNPs. **h,l** Comparison of the relative expression  
1024 of *CRL1* (h) and *HSP60-3A* (l) genes between the two genotypes using qRT-PCR after submergence  
1025 (h) and heat (l) treatment, respectively. **i,m** Heatmap of LD surrounding the two candidate regions  
1026 show above. The blue stars indicate the two representative SNPs, and the black triangles mark the  
1027 corresponding genic regions.  
1028

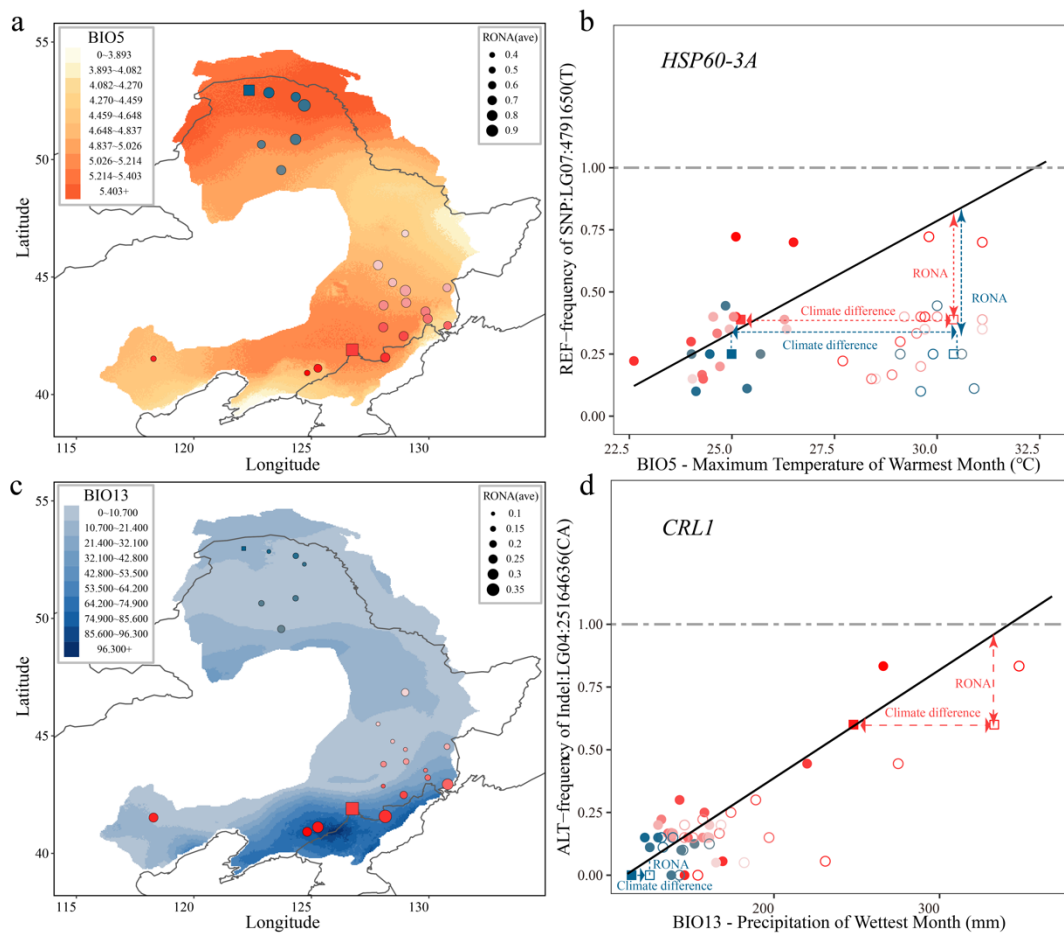

1029

1030

**Fig. 4 Risk of non-adaptedness (RONA) of *P. koreana* to future climatic conditions. a,c** RONA

1031

estimates for two environmental variables (a: BIO5; c: BIO13) for populations under the climate

1032

scenarios of SSP370 in 2060-2080. The raster colors on the map represent the degree of projected

1033

future climate change (absolute change). Areas with darker red (a) or blue (c) are predicted to

1034

experience more dramatic change in the respective climate variables. Solid circles with different

1035

colors on the map reflect different natural populations, where red and blue represents the southern

1036

and northern groups of populations, respectively. Circle size represent average RONA values in the

1037

populations and squares (one southern and one northern) indicate the two example populations

1038

illustrated in b and d. **b,d** Example diagrams of RONA to future climatic conditions, presented on

1039

genotype-environment association plot, for two climatic-associated variants within *HSP60-3A* (b)

1040

and *CRL1* (d), respectively. Hollow circles represent future climate conditions for the populations

1041

and provide the basis for calculating the required allele frequency change (RONA) to track future

1042

climatic conditions. The two example populations in (a) and (c) are again highlighted by squares.

1043



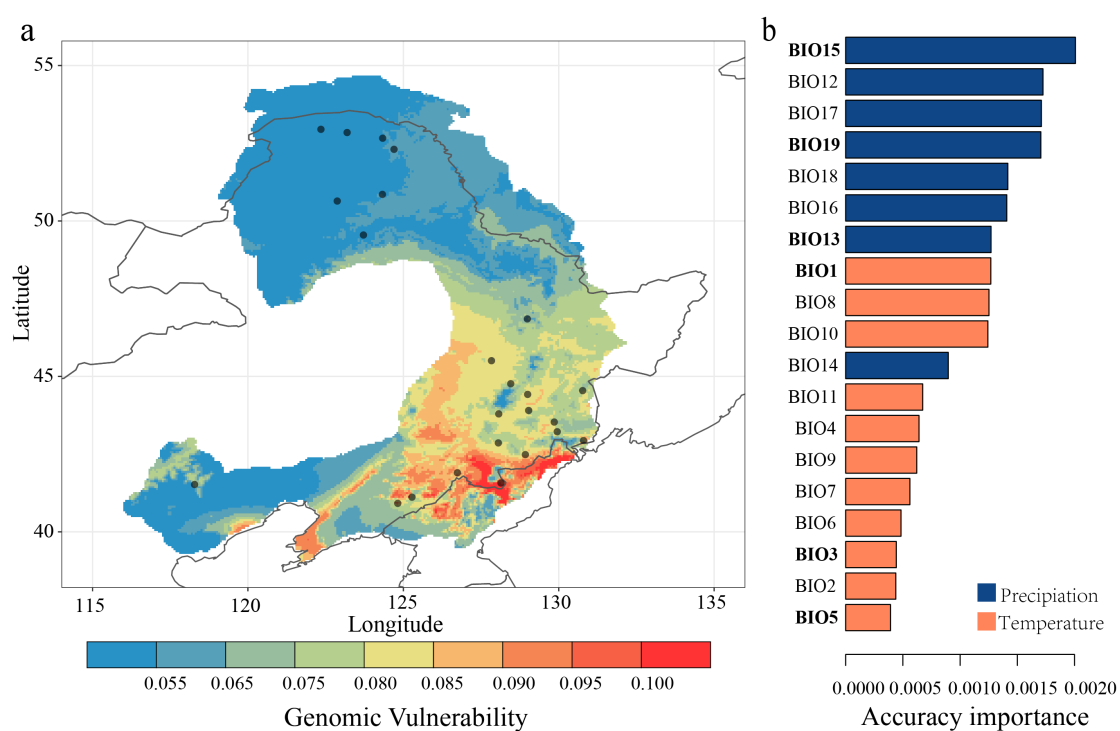

1044

1045 **Fig. 5 Gradient-forest modelling and predicted genomic vulnerability.** a Map of genetic offset

1046 across the natural distribution of *P. koreana* for the period 2060-2080 under the scenario SSP370.

1047 The color scale from blue to red refers to increasing genetic offset and points on map reflect sampled

1048 populations. b Ranked importance of 19 environmental variables based on the gradient forest

1049 analysis shows that precipitation-related environmental factors strongly explain spatial genomic

1050 variation in *P. koreana*. The six uncorrelated environmental variables selected for calculation of

1051 genetic offset are highlighted in bold text.

1052

1053

1054

1055 **Table 1** Statistics for the genome assembly and annotation

1056

| Genome assembly                   | 1057       |
|-----------------------------------|------------|
| Assembled genome size (Mb)        | 401.41     |
| Number of contigs                 | 135        |
| N50 of contigs (bp)               | 6,410,956  |
| N90 contig length (bp)            | 1,239,380  |
| Longest contig (bp)               | 17,436,127 |
| Number of protein-coding genes    | 37,072     |
| Percentage of repetitive sequence | 37.19%     |
| GC content                        | 35.12%     |
| BUSCO (complete)                  | 97.83%     |
